# Supplementary material
Source: Springer Nature journal article supplement (https://www.springermedizin.de/resource/supplementary/12879_2008_905_MOESM1_ESM.pdf/9449610)

CDC Category C event free survival

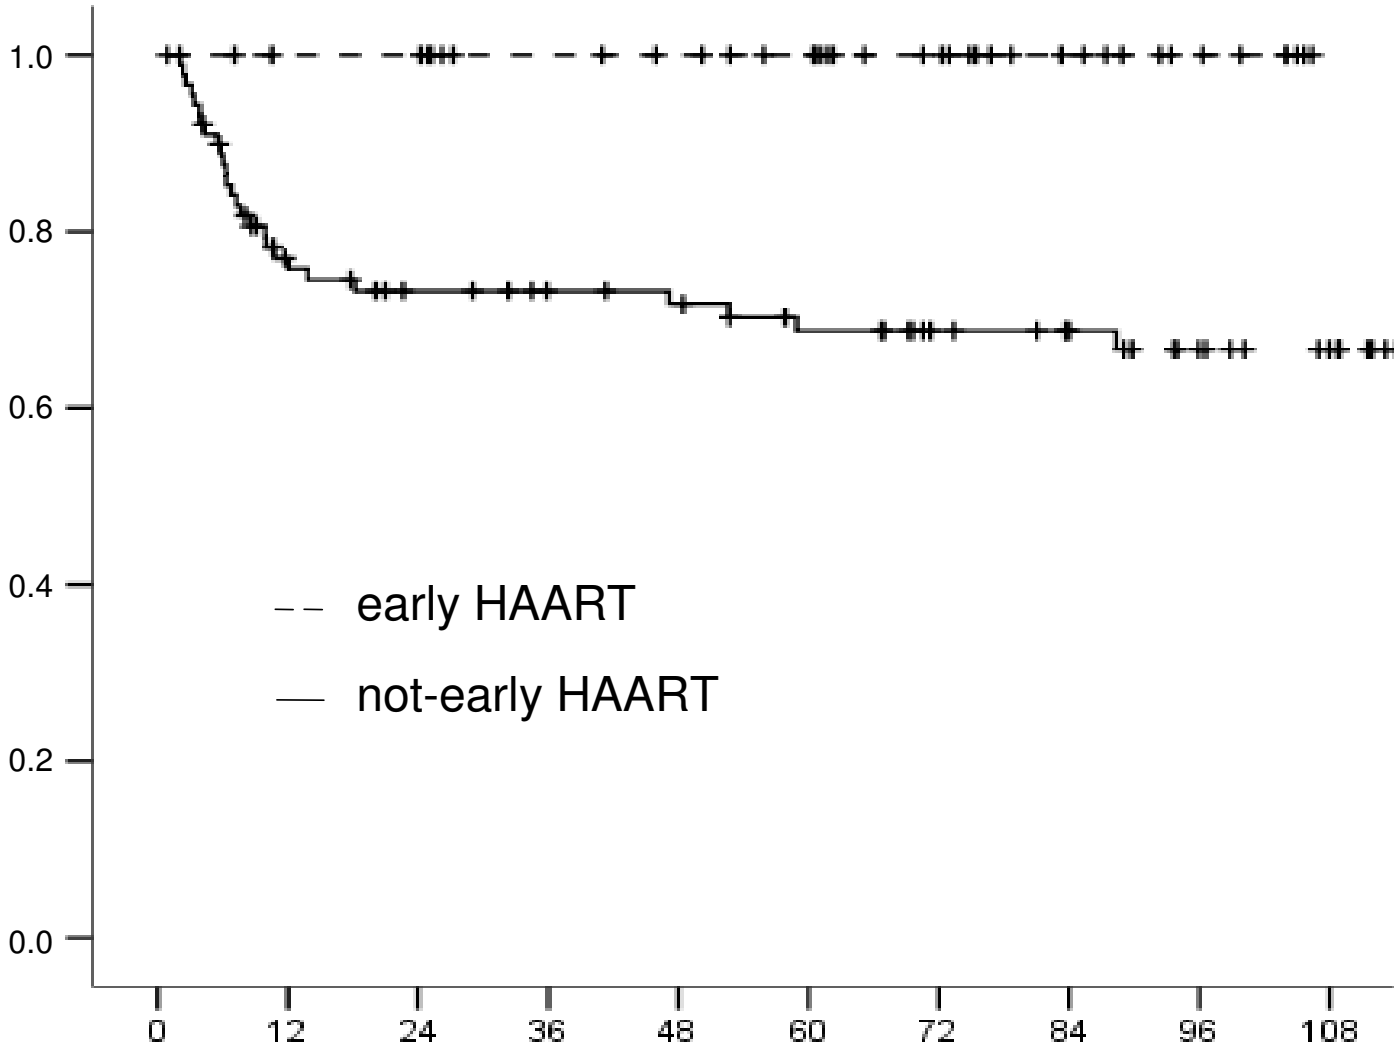

-- early HAART  
— not-early HAART

age (months)

Supplement: MOESM1 [file 9449610]
